# Supplementary material for: Genome sequence of the Mediterranean red coral Corallium rubrum
Source: Research Square preprint supplement (doi:10.21203/rs.3.rs-4582739/v2), 2024-10-15
Supplement: Supplementary file 1 [file 83feeca7f8232b4cca182063.xlsx]

## Sheet: Libraries
	Type	MaSurCa_prefix	insert size	+/-	SRA_name	colony	sampling location	tissue	sequencer	technology	date	read_length	reads_1(or2)	total_bases	coverage
	PE	p4	190	40	Crub130114_kaust_PE1_1/2	CR130114	Banuyls_sur_mer	colony-wide	KAUST	HiSeq	Apr2015	101	95138707	19218018814	29.3274
	PE	p1	400	100	Crub130114_EMBL_PE2_1/2	CR130114	Banuyls_sur_mer	colony-wide	EMBL	HiSeq	July2013	101	27478793	5550716186	8.4706
	PE	p2	280	50	Crub130114_EMBL_PE1_1/2	CR130114	Banuyls_sur_mer	colony-wide	EMBL	HiSeq	Fev2013	104	141868055	29508555440	45.0311
	PE	p3	280	50	Crub130114_EMBL_PE3_1/2	CR130114	Banuyls_sur_mer	colony-wide	EMBL	HiSeq	May2014	101	148167711	29929877622	45.6741
	PE	m1	380	90	Crub130114_EMBL_miseq1_1/2	CR130114	Banuyls_sur_mer	colony-wide	EMBL	miSeq	Apr2013	251	5798437	2910815374	4.44201
	PE	m2	380	90	Crub130114_EMBL_miseq2_1/2	CR130114	Banuyls_sur_mer	colony-wide	EMBL	miSeq	May2013	251	6626822	3326664644	5.07661
	PE	m3	400	100	Crub130114_EMBL_miseq3_1/2	CR130114	Banuyls_sur_mer	colony-wide	EMBL	miSeq	July2013	301	4682762	2819022724	4.30193
	JUMP	j5	4400	650	Crub130114_EMBL_MP3_1/2	CR130114	Banuyls_sur_mer	colony-wide	EMBL	MP_nextera	Aug2014	101	21919527	4427744454	6.7569
	JUMP	j4	3600	600	Crub130114_kaustMPr4_1/2	CR130114	Banuyls_sur_mer	colony-wide	KAUST	MP_nextera	Apr2015	101	49511831	10001389862	15.2625		total base	151974442220
	JUMP	j3	6000	900	Crub130114_kaustMPr3_1/2	CR130114	Banuyls_sur_mer	colony-wide	KAUST	MP_nextera	Apr2015	101	45285965	9147764930	13.9598		CSM_Crub_V152	655292287
	JUMP	j2	8500	1200	Crub130114_kaustMPr2_1/2	CR130114	Banuyls_sur_mer	colony-wide	KAUST	MP_nextera	Apr2015	101	52282693	10561103986	16.1166		coverage	231.919
	JUMP	j1	11000	2000	Crub130114_kaustMPr1_1/2	CR130114	Banuyls_sur_mer	colony-wide	KAUST	MP_nextera	Apr2015	101	38456260	7768164520	11.8545
	PacBio				Crub130114_Kaust_PacBio_min1500	CR130114	Banuyls_sur_mer	colony-wide	KAUST	PacBioRS II/P6_C4	June2016	1500-70000	1828519	16804603664	25.6444
														151974442220	231.919

## Sheet: metrics
	MasurCa_V151 (Illumina only)			Canu16 (PacBio)			1_Masurca_hybrid_V152 (illumina+PacBio)			2_V152-LRNA_scaffolder			3_V152-Rascaf			4_V152-Sspace			5_Metassembler_V151-152			6_Metassembler_Canu16-V151-152			7_V152s-Pillon			8_V152s-GapCloser			9_Final-Pillon = Crub Genome(V152)
Scaffold distribution
number contigs (>=500)	185364			13329			9326			8921			7912			5591			4127			2910			2910			2910			2910
number contigs (>=1000)	61815			13329			9318			8913			7901			5584			4122			2910			2910			2910			2910
number contigs (>=5000)	41733			12994			7366			6981			6043			4353			3863			2896			2896			2896			2896
number contigs (>=10000)	33133			11968			6394			6031			5109			3854			3603			2858			2858			2858			2858
number contigs (>=50000)	358			1636			3608			3369			2724			2413			2408			2282			2284			2284			2284
number contigs (>=100000)	25			283			2217			2142			1789			1711			1709			1695			1694			1696			1695
number contigs (>=500000)	0			1			117			139			268			342			342			344			345			346			345
number contigs (>=1000000)	0			0			4			9			46			66			66			66			66			66			66
====================
Scaffolds	withGaps	withoutGaps		withGaps	withoutGaps		withGaps	withoutGaps		withGaps	withoutGaps		withGaps	withoutGaps		withGaps	withoutGaps		withGaps	withoutGaps		withGaps	withoutGaps		withGaps	withoutGaps		withGaps	withoutGaps		withGaps	withoutGaps
====================
#Seqs	185364			13329			9326			8921			7912			5591			4127			2910			2910			2910			2910
Min	500	439		1003	1003		666	666		666	666		518	518		518	518		518	518		1107	1107		1102	1102		1102	1102		1102	1102
1st Qu.	596	596		13427	13427		6662	6649		6288	6274		5475	5468		6364	6292		21944	21408		57659	56744		57864	56503		57925	56959		57859	56943
Median	759	758		20506	20506		27201	26687		24990	24605		19996	19721		33184	31773		71129	69032		130686	127637		131975	128069		132121	129940		131758	129916
Mean	4947	2994		28054	28054		73520	72480		76863	75770		86516	85436		122813	120903		164388	161806		224995	221691		225235	221967		225417	223269		225186	223046
3rd Qu.	1437	1286		33663	33663		94648	92685		94969	92811		85947	84482		139050	136307		199384	194777		288670	285264		288773	284960		288780	285914		288395	285198
Max	266240	225106		564541	564541		1398118	1397140		1398118	1397140		2896117	2869046		3638373	3613253		3634678	3613985		3639898	3619588		3638516	3618527		3641674	3627731		3638999	3625056
Total	917076888	555067588		373939768	373939768		685655901	675952301		685697746	675952301		684516179	675974794		686652264	675974240		678433144	667777423		654737759	645123308		655434967	645925668		655963883	649714261		655292287	649066396
n50	21384	13859		35852	35852		188714	187018		215138	212923		311590	308629		392659	391128		401311	396244		421147	417327		421858	417795		421861	417688		421555	417651
n90	1147	753		14069	14069		42464	41400		44964	43914		50187	48989		76746	74661		83100	81649		104028	103074		104847	103909		104936	104008		104816	104096
n95	696	607		11511	11511		22612	21851		23162	22580		24389	24024		41088	40578		49540	48713		69430	68125		69454	68514		69456	68998		69334	68911
====================
Contigs	withNs	withoutNs		withNs	withoutNs		withNs	withoutNs		withNs	withoutNs		withNs	withoutNs		withNs	withoutNs		withNs	withoutNs		withNs	withoutNs		withNs	withoutNs		withNs	withoutNs		withNs	withoutNs
====================
#Seqs	296721			13329			14218			14218			12617			12140			10720			9104			8943			6571			6545
Min	64	64		1003	1003		64	64		64	64		64	64		64	64		64	64		64	64		50	50		69	69		55	55
1st Qu.	614	614		13427	13427		5913	5913		5913	5913		5211	5211		5258	5258		8432	8432		10898	10898		11284	11279		16875	16873		17024	17024
Median	860	860		20506	20506		20222	20222		20222	20222		18748	18748		19739	19739		26243	26243		33827	33827		34493	34493		49062	49061		49238	49235
Mean	1870	1867		28054	28054		47542	47538		47542	47538		53576	53574		55681	55679		62292	62290		70861	70858		72226	72205		98876	98873		99169	99167
3rd Qu.	1756	1754		33663	33663		57060	57060		57060	57060		58824	58812		61509	61493		71423	71423		86326	86326		87957	87917		123719	123716		124251	124251
Max	138436	138436		564541	564541		1054964	1054904		1054964	1054904		1089105	1089054		1089105	1089054		1089105	1089054		1089105	1089054		1092046	1091705		1467381	1467350		1465330	1465299
Total	555067588	554025716		373939768	373939768		675952301	675901695		675952301	675901695		675974794	675948019		675974240	675946644		667777423	667749003		645123308	645096017		645925668	645729366		649714261	649695500		649066396	649048687
n50	3603	3590		35852	35852		114393	114393		114393	114393		150922	150922		154294	154277		154140	154135		159155	159138		161409	161332		216293	216293		216279	216277
n90	680	680		14069	14069		24799	24799		24799	24799		27829	27829		29284	29284		31713	31713		36610	36610		36999	37001		50022	50020		50075	50073
n95	575	574		11511	11511		14928	14928		14928	14928		15956	15956		16914	16912		19059	19058		23047	23047		23468	23457		31904	31904		31967	31967
====================
Gaps
====================
#Seqs	111357						4892			5297			4705			6549			6593			6194			6033			3661			3635
Min	25						25			25			26			25			25			25			25			25			25
1st Qu.	1150						535			381			367			407			399			333			356			449			454
Median	2752						1334			1178			1150			1071			1060			987			1017			1128			1135
Mean	3250						1983			1839			1815			1630			1616			1552			1576			1707			1712
3rd Qu.	4981						2847			2671			2626			2241			2219			2143			2172			2308			2315
Max	9999						9914			9914			9914			9914			9914			9914			9914			9530			9530
Total	362009300	0.395879		0	na		9703600	0.0142261		9745445	0.0142863		8541385	0.0125171		10678024	0.015591		10655721	0.0157483		9614451	0.0147261		9509299	0.0148079		6249622	0.00955599		6225891	0.00952796
n50	5054						3504			3499			3490			2886			2864			2851			2856			2953			2967
n90	1862						1063			1038			1020			886			881			867			870			909			910
n95	1260						697			660			650			590			585			575			580			607			610
====================
Non-gapped Ns Count:	1041872			0			50606			50606			26775			27596			28420			27291			196302			18761			17709
====================

## Sheet: graphs
		assembling			scaffolding			metassembling		polishing										assembling			scaffolding			metassembling		polishing
Scaffold distribution		V151	Canu16	1_v152	2	3	4	5	6	7	8	9								V151	Canu16	1_v152	2	3	4	5	6	7	8	9
	>=500	185364	13329	9326	8921	7912	5591	4127	2910	2910	2910	2910						Scaffolds	Scaff_n50	21384	35852	188714	215138	311590	392659	401311	421147	421858	421861	421555
	>=1000	61815	13329	9318	8913	7901	5584	4122	2910	2910	2910	2910							Scaff_n90	1147	14069	42464	44964	50187	76746	83100	104028	104847	104936	104816
	>=5000	41733	12994	7366	6981	6043	4353	3863	2896	2896	2896	2896
	>=10000	33133	11968	6394	6031	5109	3854	3603	2858	2858	2858	2858						contigs	Contig_n50	3603	35852	114393	114393	150922	154294	154140	159155	161409	216293	216279
	>=50000	358	1636	3608	3369	2724	2413	2408	2282	2284	2284	2284							Contig_n90	680	14069	24799	24799	27829	29284	31713	36610	36999	50022	50075
	>=100000	25	283	2217	2142	1789	1711	1709	1695	1694	1696	1695
	>=500000	0	1	117	139	268	342	342	344	345	346	345							#sequences		13329	9364	8921	7912	5591	4127	2910	2910	2910	2910
	>=1000000	0	0	4	9	46	66	66	66	66	66	66
		assembly step
		V151	Canu16	1_v152	2	3	4	5	6	7	8	9
1	>=1000000	0	0	4	9	46	66	66	66	66	66	66
2	>=500000	0	1	113	130	222	276	276	278	279	280	279
3	>=100000	25	282	2100	2003	1521	1369	1367	1351	1349	1350	1350
4	>=50000	333	1353	1391	1227	935	702	699	587	590	588	589
5	>=10000	32775	10332	2786	2662	2385	1441	1195	576	574	574	574
6	>=5000	8600	1026	972	950	934	499	260	38	38	38	38
7	>=1000	20082	335	1952	1932	1858	1231	259	14	14	14	14
8	>=500	123549	0	8	8	11	7	5	0	0	0	0
	Total	185364	13329	9326	8921	7912	5591	4127	2910	2910	2910	2910
	% Ns	0.375995	0	0.0156206	0.0142863	0.0125171	0.015591	0.0157483	0.0147261	0.0148079	0.00955599	0.00952796
		V151	v152
	% Ns	0.395879	0.0142261
