# Supplementary material for: Genome sequence of the Mediterranean red coral Corallium rubrum
Source: Research Square preprint supplement (doi:10.21203/rs.3.rs-4582739/v2), 2024-10-15
Supplement: Supplementary file 2 [file c63543fe7089fec68513aeb2.docx]

**Genome sequence of the Mediterranean red coral *Corallium rubrum*.**

SUPPLEMENTARY text

**Data accessibility:**

Figshare repository:

Figures1-3 complementary to this Ms are in DataFiles 1,2,3

The scripts used in this supplementary materials are provided as DataFile5 (MsGenomeScript.txt).

Metrics for Libraires inputs and Assemblies outputs are in the tables of DataFile6 (Libraries and Metrics.xlsx)

Alignment of the Genome Assembly (V152) and the RNA reads (CRmiseq) are available in Dataset2 (BAM file)

NCBI repository:

Sequence Reads Archives (SRA) are deposited under accessions SRR29212214 to SRR29212226 on NCBI

Genome Warehouse

The whole genome sequence data (pg_Cr_csm) reported in this paper have been deposited in the Genome Warehouse in National Genomics Data Center.

Title : Corallium rubrum genome sequence CSM

Bioproject : PRJCA026883

BioSample : SAMC3811372

Submission ID : Batch0088608

Accession : GWHESWX00000000.1

Genome Sequence File Name : Crub_genomeV152.fasta

************

**Biological Material:**

A single colony of the Mediterranean red coral *Corallium rubrum* was collected by scuba diving off the coast of Banyuls-sur-Mer by Pascal Romans (Observatoire Océanologique de Banyuls-Laboratoire Arago, Centre de Ressources Biologiques Marines, Quai Racovizta, 66650 Banyuls-sur-Mer, France) and then transferred to the culture facility at the Centre Scientifique de Monaco (see photograph in Figure 1A).

**Nucleic acids purification**

High-quality genomic DNA and total RNA were extracted from this colony as followed:

-Genomic DNA : Cells were harvested using a Water Pick in 50 ml of 0.2 M EDTA solution refrigerated at 4°C. Extracts were passed through cell strainer (Falcon®) 100 µm. Then extracts were centrifuged at 2000 g for 10 min at 4°C. Supernatant was discarded and pellets were homogenized in the lysis buffer (G2) of Qiagen Genomic DNA isolation kit. Then DNA was extracted following manufacturer instructions using genomic-tip 100/G.

-Total RNA extraction was performed as described in (Moya et al, 2008). Briefly, Colony pieces were snap-frozen in liquid nitrogen and ground into powder in a cryogrinder (Freezer/Mill 6770, Spex Sample Prep) and then extracted with TRIzol Reagent (Invitrogen) according to manufacturer’s instructions.

Total RNA and DNA was quality-checked using a Bioanalyzer 2100 and send to the Genomics Core Facility and the KAUST Bioscience Core lab for library preparation and sequencing.

************

**Libraries preparation and sequencing**

**mRNA Sequencing and assembly:**

For mRNA sequencing, paired-end reads for Illumina sequencing were generated from oligo-dT selected total RNA. A Paired-end (PE) library with average insert sizes of 350 bp was generated and sequenced at EMBL on the Illumina MiSeq platform, producing 2x 250 bp reads. mRNA reads were post-processed using trimmomatic-0.30 and assembly was generated using Trinity (r2014-07-17) with default parameters as described in (LeGoff 2016). In brief, normalization was performed prior to Trinity assembly, and a CD-HIT_EST merging step was applied after Trinity. The resulting assembly, named V_5.3, is publicly available on the Centre Scientifique server at [http://data.centrescientifique.mc/] (see Le Goff et al., 2016). The sequences from this transcriptome assembly were used at Step 2 of the genome assembly pipeline (see below), and was mapped to the final genome sequence using star (see below).

****

**DNA Sequencing:**

Two types of sequencing libraries and methods were used: Illumina short reads (paired-end and mate-pair) and PacBio long reads. DNA was send at the Genomics Core Facility (GeneCore) of EMBL (European Molecular Biology Laboratory, Heidelberg, Germany) and at the Core Labs sequencing facility of KAUST (King Abdullah University of Science and Technology, Thuwal, Saudi Arabia) for libraries preparations and sequencing (Table 1). In summary, 4 types of libraries were sequenced: Paired-end on Illumina_Hiseq (PE) ; Paired-end on Illumina_miseq (miseq) ; Mate-Pair on Illumina_Hiseq (MP) ; PacBio on PacBio (PacBio)

**Illumina Sequencing:**

Paired-end (PE) libraries with insert average sizes of 190, 280, and 400 bp were sequenced on Illumina HiSeq 2000 platform, producing 2x 100 bp reads. Additionally, two libraries with insert average sizes of 380 and 400 bp were sequenced on Illumina MiSeq platform, producing 2x 250 bp reads.

Mate paired (MP) Nextera libraries were produced with insert average sizes of 3.6, 4, 6 kb, 8.5, and 11 kb. All MP libraries were sequenced on Illumina HiSeq 2000 platform (in the respective sequencing facilities, table1), producing 2x 101 bp reads.

**PacBio Sequencing:** The same DNA extract was sequenced on a PacBio RS II platform with P6_C4 chemistry to generate long reads of up to 70 kb. The resulting PacBio long reads coverage was estimated to be 34x (Table 1).

**Assembly**

All scripts and assemblies were run on a Dell PowerEdge R910 server with 1 terabyte of RAM.

**Reads post Processing**

All reads were processed for quality checks using Fastqc.

For assemblies, MaSurCa works best with raw reads (illumina&PacBio) as the pipeline includes its own tailored correction algorithms; Canu was used with the Long raw reads longer than 1500bp.

For scaffolding and correcting/polishing steps, PE and MP reads were post-processed using Trimomatic (all), bbnorm (PE), bbmerge (ovelapping PE libraries) and Nextclip/Prinseq (MPs), see MsGenomeScripts.txt for Details.

In brief, the first post-processing step was always Trimmomatic. For scaffolding step sspace, mate-pair reads were individually processed with NextClip, which produce 4 types of sub-libraries (A,B,C,D). The ABC sub-libaries were merged and trimmed using Prinseq to remove possible contaminant sequences. At the Polishing and gapclosing steps, libraries were first corrected with bbnorm_ecc. Then, the overlapping miseq reads were merged with bbmerge. The number of reads and estimated coverage for each library are provided in Table 1.

**Assembly pipelines:**

For the Genome assembly (see figure 2), three independent assemblies were generated using either MaSuRCA-3.2.2 (hybrid PacBio/Illumina (V152) or Illumina_only (V151)) or Canu1-6 (PacBio (canuV1-6)) softwares. The main assembly was built along the output of the MaSuRCA-3.2.2 in hybrid PacBio/Illumina mode (V152). This latter assembly was further refined with 3 scaffolding steps, using information from i) transcriptome data (trinity output); ii) mRNA reads data (trinity input) ; iii) mate pair reads data. The resulting assembly (V152) was next merged with the previous assemblies (V151 and CanuV1-6) using Metassembler. Finally the resulting assembly was polished with Pilon and GapCloser. The overall assembly pipeline is shown in Figure 2.

**Main Assembly: Masurca Hybrid**

The core assembly strategy was based on MaSuRCA-3.2.2, which allows for hybrid assembly using both long and short reads (Step 1). All reads (except Crub130114_EMBL_MP_1/2) were loaded and assembled with parameters provided in the MsScript supplementary materials. Three consecutives contig scaffolding steps were then applied using information from the mRNAs sequences, the RNA libraries insert sizes and the Mate pair libraries : LRNA_scaffolder using the V_5.3 transcript sequences (Step 2) ; Rascaf using the quality-trimmed RNA library reads (Step 3) ; SSPACE using the 4 kb insert size Crub130114_EMBL_MP_1 reads (Step 4). We tested the 3 algorithms in different orders and found that in our hands, this order gave the best results (based on simple metrics counts).

Importantly, after each assembly step of the pipeline (MaSurCa assembly V151,152, LRnascaff, Rascaf, sspace), any scaffold containing a gap longer than 10,000 Ns was split into 2 contigs without Ns, using homemade scripts (MsGenomeScripts.txt).

**Metassembly**

In parallel, separate assemblies were generated using: only the Illumina reads (paired-end and all Mate pair reads) with Masurca, and only the PacBio reads with Canu, both using default parameters.

The 3 assemblies were merge into a single one: Metassembler, an algorithm that merges multiple genome assemblies into a single superior sequence, was used. It employs progressive pairwise alignments in the order specified by the user. For the merge of the three assemblies:

- The hybrid Masurca assembly was set as the primary assembly, and the Masurca assembly using only Illumina reads was set as secondary (Step 5).
- Then, this merged Masurca assembly was set as primary and the Canu assembly was set as secondary (Step 6). Hence, the main Masurca hybrid assembly remained the leader sequence.

**Error correction, Gap filling and Polishing**

Finally, error correction using Pilon (Step 7), GapCloser for gap filling (Step 8), and a second Pilon processing (Step 9) was applied to generate the final assembly. Metrics were generated after each step using the home made summarizeAssembly.sh script which merge 2 statistics python scripts, the first one, contig_stats.py (from Markus Fritz and Tobias Raush), counts the number of sequences belonging to different length intervals [500, 1.000, 5.000, 10.000, 50.000, 100.000, 500.000, 1.000.000 bp] ; the second is part of PBSuite (v15.8.24) and calculate various metrics for Scaffolds, Contigs, and GAPs. All metrics counts are given in DataFile6 and summarized as graphs in Figure 3.

************

**Alignment**

**STAR alignment of the Genome and the mRNA reads**

With GMAP, we first produced a genome coordinate file by aligning the final genome sequence (V_152) against the V_53 transcriptome. The produced ‘gff’ file was converted into ‘gtf’ using gffread. The resulting ‘gtf’ was included into the first step of STAR (V2.7.10b) for generating the genome reference. Next, alignment of the genome with the CRmiseq reads (see mRNA sequencing) was produced in the two-mode pass (first pass to reassert the splice junctions, second pass for alignment using splice junction information). The resulting BAM file is available in DataSet2.
